# Supplementary material
Source: MDPI journal article supplement (https://www.mdpi.com/2071-1050/11/16/4263)
Supplement: s1 [file s1]

## Questionnaires

1. What Tartary buckwheat landrace do you cultivate?
2. Why do you cultivate multiple landraces?
3. How many years do you cultivate this/these landraces?
4. How do you evaluate this/these landraces? /Why do you like to cultivate these landraces?
  - a. Good flavor; b. High flour yield; c. High yield; d. Suitable for cultivating in High mountain; e. Two crops a year.
5. What seed source of landraces?
  - a. Self-saving; b. Exchanging with neighbors; c. Exchanging with relatives; d. Purchasing from market
5. Will you try to grow other landraces, why?
6. If you want to cultivate other landraces, how do you get the seeds?
  - a. Exchanging with relatives; b. Bartering with non-relatives; c. Purchasing from market; d. Accessing through borrow; e. Wedding dowry; f. Issued by agriculture bureau.
7. Whom do you often exchange seeds with?
8. Which Tartary buckwheat landraces do you want to get?
9. How often do you change seeds?
10. Why not cultivate the same landrace all the time?
